# Supplementary material for: Structure directing influence of precursor compositions on the formation of macroscopic inorganic oxide nanocomposite fibers
Source: Royal Society of Chemistry journal article supplement (doi:10.1039/b816314f), 2009-01-01
Supplement: b816314f.pdf [file b816314f.pdf]

**Electronic supplementary information (ESI)**

**Table S1**

**Important parameters of the synthesized samples**

| Sample                                           | Molar amount of metal salt | Si/M molar ratio |               | Particle size of metal oxide (nm) | BET area (m <sup>2</sup> /g) | Total pore volume (cm <sup>3</sup> /g) | Average pore diameter (nm) |
|--------------------------------------------------|----------------------------|------------------|---------------|-----------------------------------|------------------------------|----------------------------------------|----------------------------|
|                                                  |                            | Mixed precursors | Final product |                                   |                              |                                        |                            |
| SiO <sub>2</sub>                                 | ---                        | ---              | ---           | ---                               | 700                          | 0.444                                  | 2.5                        |
| CeO <sub>2</sub> /SiO <sub>2</sub>               | 0.0046                     | 10.65            | 2.3           | <5                                | 257                          | 0.215                                  | 3.3                        |
| Fe <sub>2</sub> O <sub>3</sub> /SiO <sub>2</sub> | 0.0062                     | 7.96             | 3.4           | 8                                 | 296                          | 0.24                                   | 3.4                        |
| In <sub>2</sub> O <sub>3</sub> /SiO <sub>2</sub> | 0.0052                     | 9.37             | 6.0           | 5                                 | 264                          | 0.173                                  | 2.6                        |
| SiO <sub>2</sub> / SnO <sub>2</sub>              | 0.0089                     | 5.54             | 0.31          | 10~15                             | 160                          | 0.283                                  | 7.1                        |
| H/SiO <sub>2</sub>                               | ---                        | ---              | ---           | ---                               | 560                          | 0.52                                   | 4.0                        |

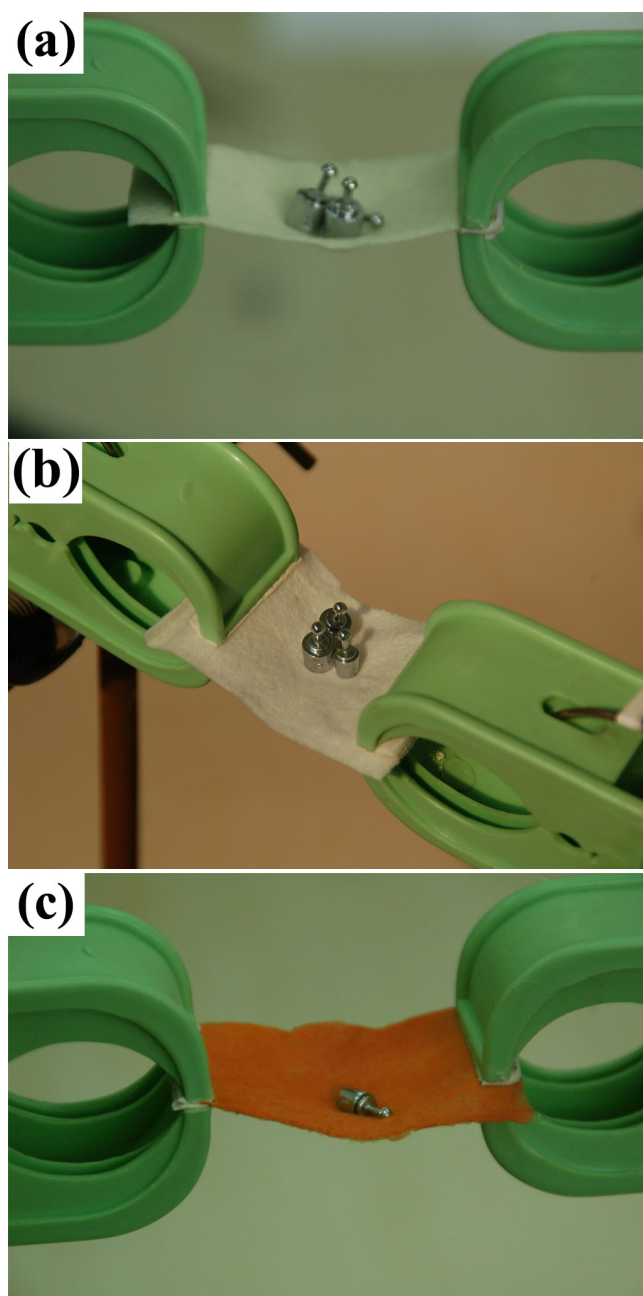

**Fig. S2.** Three textiles loaded with poises of different weights: a)  $\text{CeO}_2/\text{SiO}_2$ ; b)  $\text{In}_2\text{O}_3/\text{SiO}_2$ ; c)  $\text{Fe}_2\text{O}_3/\text{SiO}_2$ .

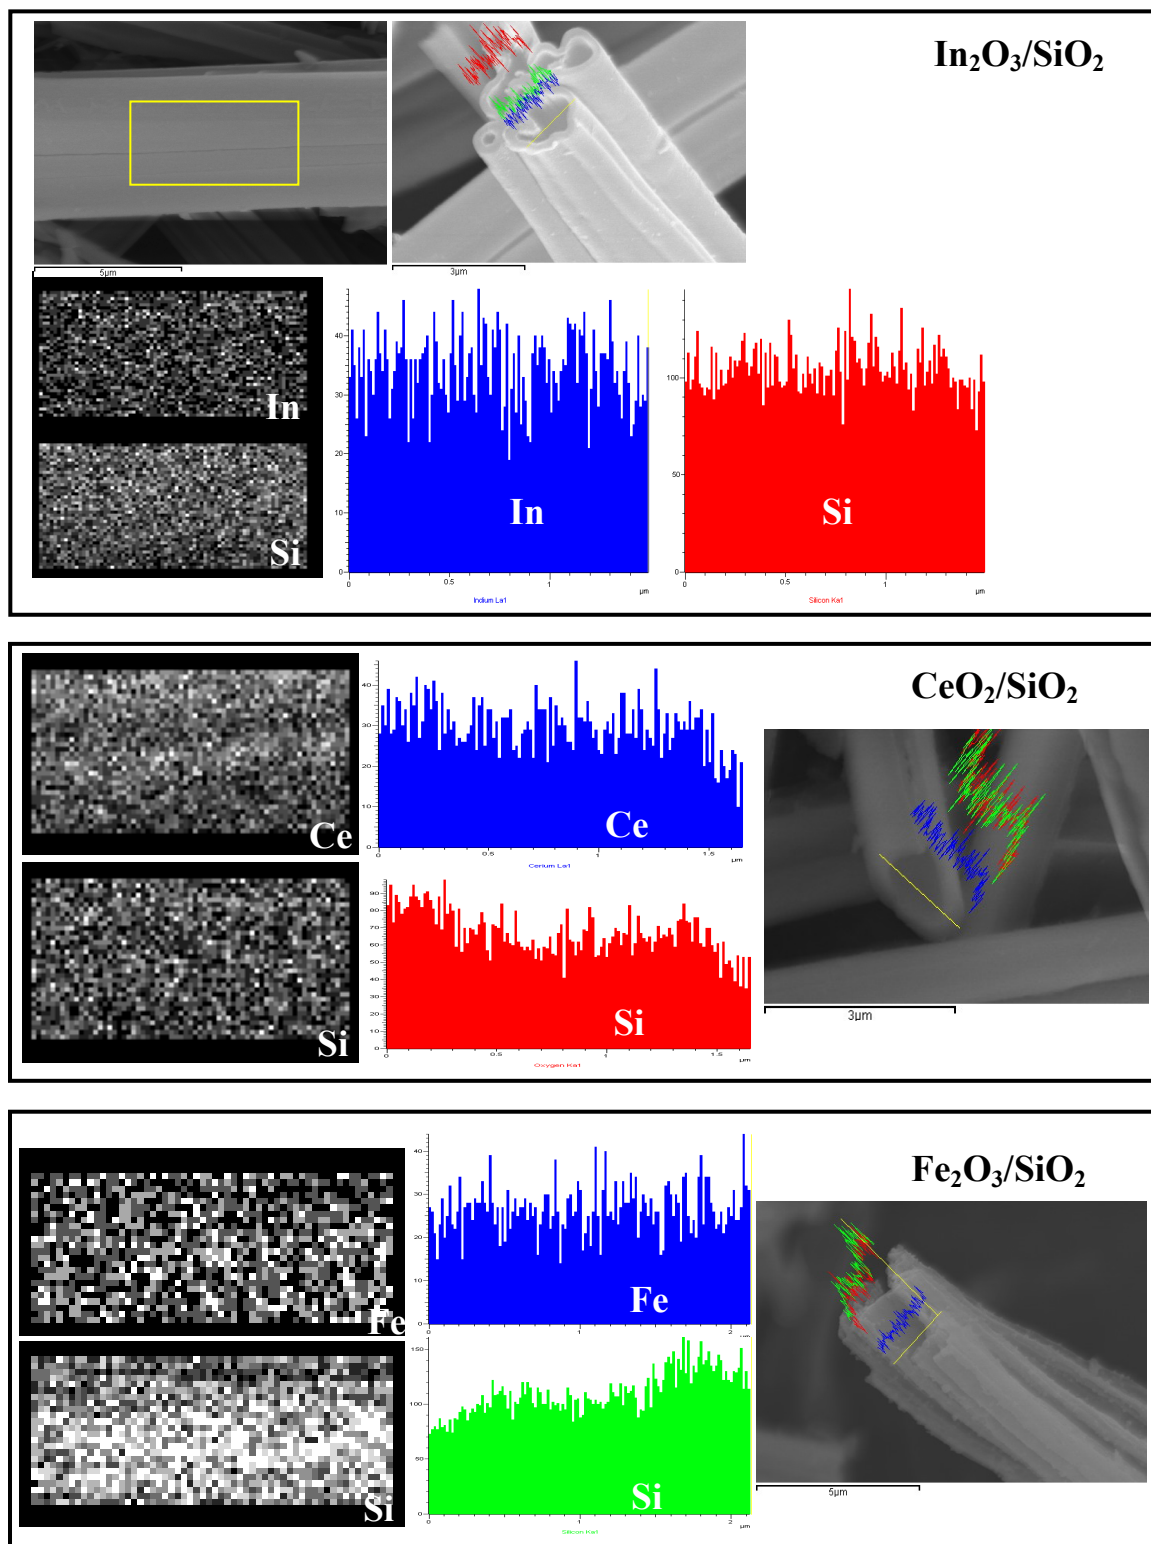

**Fig. S3.** Elemental mapping patterns of a selected area along the fiber length and elemental line profiles for three hollow composite fibers.
